# Supplementary material for: Tunable self-cleaving ribozymes for modulating gene expression in eukaryotic systems
Source: PubMed Central journal article supplement (PMC7192461; doi:10.1371/journal.pone.0232046), 2020-04-30

**A**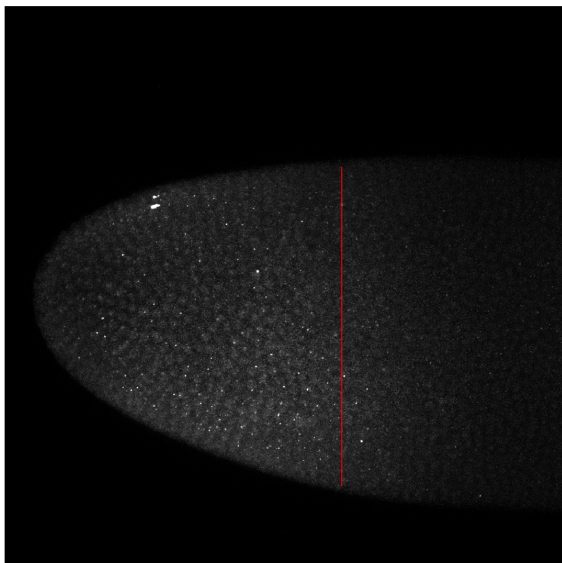**B**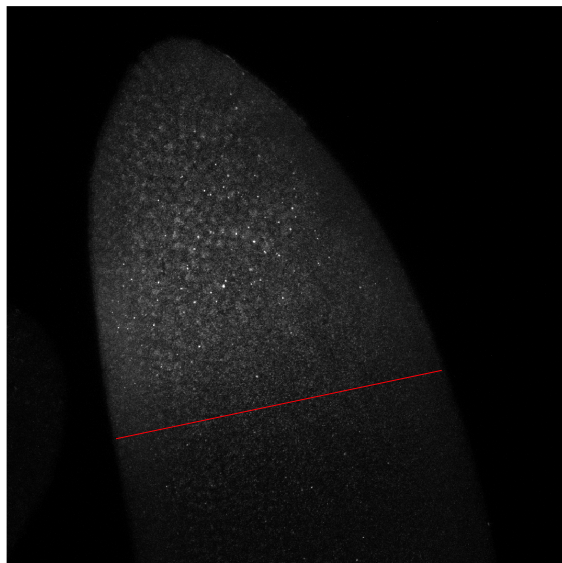**C**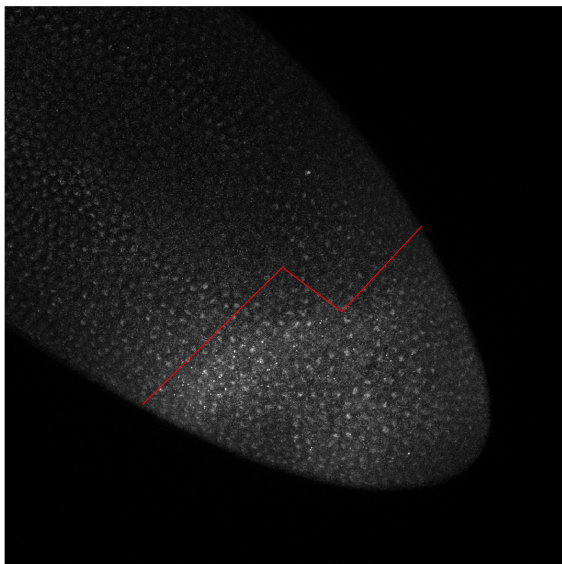**D**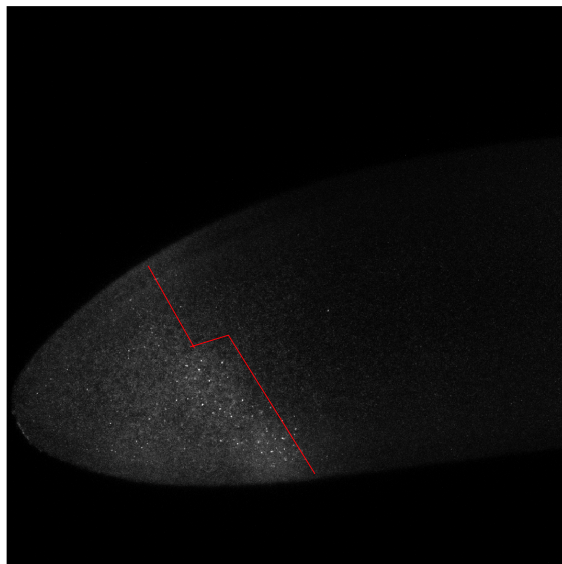

Supplement: pone.0232046.s003.pdf [file pone.0232046.s003.pdf]
