# Supplementary material for: Tunable self-cleaving ribozymes for modulating gene expression in eukaryotic systems
Source: PubMed Central journal article supplement (PMC7192461; doi:10.1371/journal.pone.0232046), 2020-04-30

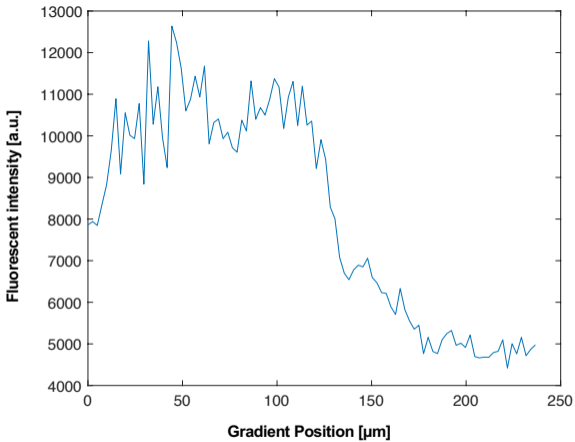

Supplement: pone.0232046.s005.pdf [file pone.0232046.s005.pdf]
